# Supplementary material
Source: PubMed Central journal article supplement (PMC7227056)
Supplement: ao0c00901_si_001.pdf [file ao0c00901_si_001.pdf]

*Supporting information*

**Chemical Fingerprinting of Conifer Needle Essential Oils and Solvent  
Extracts by Ultrahigh-Resolution Fourier Transform Ion Cyclotron  
Resonance Mass Spectrometry**

*Omolara O. Mofikoya, Marko Mäkinen, and Janne Jänis\**

*University of Eastern Finland, Department of Chemistry, P.O. Box 111, FI-80101 Joensuu, Finland*

*\*Corresponding author: Email: [janne.janis@uef.fi](mailto:janne.janis@uef.fi), Tel. +358-50-4601057*

**Contents:**

**Supporting Tables S1–S4**

**Supporting Figures S1 and S2**

**Table S1.** Compounds identified with (–) ESI from conifer needle essential oils.

| Calculated<br><i>m/z</i> [M–H] <sup>–</sup> | Observed<br><i>m/z</i> [M–H] <sup>–</sup> | Error<br>(ppm) | DBE | Elemental<br>formula                           | Relative intensity (%) |         |         |         | Putative compound(s)           |
|---------------------------------------------|-------------------------------------------|----------------|-----|------------------------------------------------|------------------------|---------|---------|---------|--------------------------------|
|                                             |                                           |                |     |                                                | Pine                   | Spruce  | Larch   | Juniper |                                |
| 101.060803                                  | 101.060787                                | 0.1583         | 1   | C <sub>5</sub> H <sub>10</sub> O <sub>2</sub>  | 0.2434                 | N.D.    | N.D.    | N.D.    | 3-Methylbutanoic acid          |
| 121.029503                                  | 121.029504                                | 0.0103         | 5   | C <sub>7</sub> H <sub>6</sub> O <sub>2</sub>   | 1.1166                 | 0.2880  | 0.6484  | 0.1846  | Benzoic acid                   |
| 133.065888                                  | 133.065877                                | 0.0827         | 5   | C <sub>9</sub> H <sub>10</sub> O <sub>1</sub>  | 0.0398                 | N.D.    | N.D.    | N.D.    | Cinnamyl alcohol               |
| 137.024418                                  | 137.024414                                | 0.0292         | 5   | C <sub>7</sub> H <sub>6</sub> O <sub>3</sub>   | 0.0332                 | 0.0327  | N.D.    | N.D.    | Salicylic acid                 |
| 143.107753                                  | 143.107756                                | 0.0192         | 1   | C <sub>8</sub> H <sub>16</sub> O <sub>2</sub>  | 1.2584                 | 0.8338  | 0.7156  | 1.2582  | Octanoic acid                  |
| 147.045153                                  | 147.045165                                | 0.0816         | 6   | C <sub>9</sub> H <sub>8</sub> O <sub>2</sub>   | 0.0212                 | 0.0220  | N.D.    | N.D.    | Cinnamic acid                  |
| 149.097189                                  | 149.097200                                | 0.0740         | 4   | C <sub>10</sub> H <sub>14</sub> O <sub>1</sub> | 0.0909                 | 0.0422  | 0.1290  | 0.8362  | Verbenone                      |
| 151.040068                                  | 151.040067                                | 0.0588         | 5   | C <sub>8</sub> H <sub>8</sub> O <sub>3</sub>   | 0.1205                 | 0.7678  | 0.0091  | N.D.    | 4-hydroxyphenyl acetic acid    |
| 153.128489                                  | 153.128504                                | 0.0980         | 2   | C <sub>10</sub> H <sub>18</sub> O <sub>1</sub> | N.D.                   | N.D.    | 0.0115  | N.D.    | Terpinen-4-ol                  |
| 163.076453                                  | 163.076463                                | 0.0598         | 5   | C <sub>10</sub> H <sub>12</sub> O <sub>2</sub> | 0.2556                 | 0.1549  | 0.0173  | 0.1059  | Eugenol                        |
| 165.055718                                  | 165.055718                                | 0.0000         | 5   | C <sub>9</sub> H <sub>10</sub> O <sub>3</sub>  | 0.0504                 | 0.0968  | N.D.    | 0.0063  | Dihydro-p-coumaryl acid        |
| 167.034982                                  | 167.035005                                | 0.1377         | 5   | C <sub>8</sub> H <sub>8</sub> O <sub>4</sub>   | 0.0262                 | 0.0339  | N.D.    | 0.0078  | Vanillin                       |
| 167.107753                                  | 167.107764                                | 0.0643         | 3   | C <sub>10</sub> H <sub>16</sub> O <sub>2</sub> | 4.7921                 | 5.8765  | 0.0333  | 3.0039  | Geranic acid                   |
| 169.123403                                  | 169.123408                                | 0.0296         | 2   | C <sub>10</sub> H <sub>18</sub> O <sub>2</sub> | 21.6252                | 25.5989 | 0.0371  | 9.2987  | Citronellic acid               |
| 171.139053                                  | 171.139069                                | 0.0920         | 1   | C <sub>10</sub> H <sub>20</sub> O <sub>2</sub> | 1.9039                 | 1.9187  | 0.5046  | 1.4933  | Decanoic acid                  |
| 177.092103                                  | 177.092092                                | 0.0635         | 5   | C <sub>11</sub> H <sub>14</sub> O <sub>2</sub> | 0.0188                 | 0.0263  | 0.0122  | 0.0305  | Methyl eugenol                 |
| 181.123403                                  | 181.123410                                | 0.0400         | 3   | C <sub>11</sub> H <sub>18</sub> O <sub>2</sub> | 0.0623                 | 0.1167  | 0.0116  | 0.0304  | Terpinyl formate               |
| 183.102668                                  | 183.102680                                | 0.0065         | 3   | C <sub>10</sub> H <sub>16</sub> O <sub>3</sub> | 0.1679                 | 0.1296  | 0.0489  | 0.0867  | Pinonic acid                   |
| 183.139053                                  | 183.139072                                | 0.1065         | 2   | C <sub>11</sub> H <sub>20</sub> O <sub>2</sub> | 0.4203                 | 0.5523  | 0.1860  | 0.2925  | Z-3-Hexenyl isovalerate        |
| 185.081932                                  | 185.081953                                | 0.1121         | 3   | C <sub>9</sub> H <sub>14</sub> O <sub>4</sub>  | 0.1602                 | 0.0686  | 0.0647  | 0.1472  | Pinic acid                     |
| 191.056112                                  | 191.056153                                | 0.2146         | 2   | C <sub>7</sub> H <sub>12</sub> O <sub>6</sub>  | 0.0308                 | 0.0761  | 0.0110  | 0.0324  | Quinic acid                    |
| 193.050632                                  | 193.050629                                | 0.0173         | 6   | C <sub>10</sub> H <sub>10</sub> O <sub>4</sub> | 0.0193                 | 0.0417  | N.D.    | 0.0075  | Ferulic acid                   |
| 193.123403                                  | 193.123431                                | 0.1450         | 4   | C <sub>12</sub> H <sub>18</sub> O <sub>2</sub> | 0.0485                 | 0.0757  | 0.0731  | 0.0548  | Myrtenyl acetate               |
| 195.139053                                  | 195.139064                                | 0.0577         | 3   | C <sub>12</sub> H <sub>20</sub> O <sub>2</sub> | 0.1248                 | 0.1848  | 0.0486  | 4.5168  | Terpinyl acetate               |
| 205.123403                                  | 205.123430                                | 0.1292         | 5   | C <sub>13</sub> H <sub>18</sub> O <sub>2</sub> | 0.0539                 | 0.2114  | 0.0103  | N.D.    | Phenylethyl-3-methyl butanoate |
| 205.159789                                  | 205.159796                                | 0.0341         | 4   | C <sub>14</sub> H <sub>22</sub> O <sub>1</sub> | 0.0633                 | N.D.    | 0.0755  | 0.2079  | $\alpha$ -Irene                |
| 209.081932                                  | 209.081942                                | 0.0454         | 5   | C <sub>11</sub> H <sub>14</sub> O <sub>4</sub> | 0.0317                 | 0.0364  | 0.0263  | N.D.    | Sinapyl alcohol                |
| 209.154703                                  | 209.154714                                | 0.0526         | 3   | C <sub>13</sub> H <sub>22</sub> O <sub>2</sub> | 0.1467                 | 0.1999  | 0.2829  | 0.1291  | Isobornyl propionate           |
| 215.165268                                  | 215.165286                                | 0.0837         | 1   | C <sub>12</sub> H <sub>24</sub> O <sub>3</sub> | N.D.                   | N.D.    | 0.1071  | 0.0374  | Sabinic acid                   |
| 215.165268                                  | 217.159825                                | 0.1658         | 5   | C <sub>15</sub> H <sub>22</sub> O <sub>1</sub> | 0.0194                 | N.D.    | 0.0106  | 0.0448  | Nootkatone                     |
| 219.175439                                  | 219.175448                                | 0.0395         | 4   | C <sub>15</sub> H <sub>24</sub> O <sub>1</sub> | 0.1145                 | 0.0235  | 0.0116  | 0.1006  | Caryophyllene oxide            |
| 221.081932                                  | 221.081946                                | 0.0645         | 6   | C <sub>12</sub> H <sub>14</sub> O <sub>4</sub> | 0.0466                 | 0.0233  | 0.1101  | 0.0280  | Dillapiole                     |
| 221.191089                                  | 221.191093                                | 0.0158         | 3   | C <sub>15</sub> H <sub>26</sub> O <sub>1</sub> | 0.0545                 | N.D.    | 0.3763  | 0.0570  | Germacrene D-4-ol              |
| 227.071368                                  | 227.071389                                | 0.0910         | 9   | C <sub>14</sub> H <sub>12</sub> O <sub>3</sub> | 0.5709                 | 0.0669  | N.D.    | 0.0246  | Benzyl salicylate              |
| 227.201654                                  | 227.201674                                | 0.0866         | 1   | C <sub>14</sub> H <sub>28</sub> O <sub>2</sub> | 5.8457                 | 7.8471  | 6.7531  | 11.5091 | Ethyl laurate                  |
| 237.186004                                  | 237.186029                                | 0.1043         | 3   | C <sub>15</sub> H <sub>26</sub> O <sub>2</sub> | 0.4452                 | 0.2997  | 0.0469  | 0.2204  | Geranyl isovalerate            |
| 239.201654                                  | 239.201685                                | 0.1275         | 2   | C <sub>15</sub> H <sub>28</sub> O <sub>2</sub> | 0.3200                 | 0.6206  | 0.5442  | 0.2858  | Methyl isovalerate             |
| 253.217304                                  | 253.217330                                | 0.1007         | 2   | C <sub>16</sub> H <sub>30</sub> O <sub>2</sub> | 1.0361                 | 1.5414  | 2.8826  | 1.1305  | Cyclohexadecanolide            |
| 255.232954                                  | 255.232940                                | 0.0539         | 1   | C <sub>16</sub> H <sub>32</sub> O <sub>2</sub> | 25.0550                | 19.8753 | 46.7484 | 28.3596 | Palmitic acid                  |
| 269.248604                                  | 269.248597                                | 0.0269         | 1   | C <sub>17</sub> H <sub>34</sub> O <sub>2</sub> | 0.9011                 | 0.9374  | 1.3521  | 0.5864  | Methyl palmitate               |
| 271.227868                                  | 271.227879                                | 0.0396         | 1   | C <sub>16</sub> H <sub>32</sub> O <sub>3</sub> | 0.4615                 | 0.6611  | 0.5226  | 0.2946  | Hydroxypalmitic acid           |

|            |            |        |   |                                                |         |        |         |         |                                              |
|------------|------------|--------|---|------------------------------------------------|---------|--------|---------|---------|----------------------------------------------|
| 281.248604 | 281.248591 | 0.0471 | 2 | C <sub>18</sub> H <sub>34</sub> O <sub>2</sub> | 3.7514  | 4.6453 | 4.5079  | 2.5868  | Oleic acid                                   |
| 283.264254 | 283.264240 | 0.0512 | 1 | C <sub>18</sub> H <sub>36</sub> O <sub>2</sub> | 12.8553 | 2.5077 | 3.8847  | 9.3023  | Steric acid                                  |
| 289.253689 | 289.253636 | 0.1832 | 4 | C <sub>20</sub> H <sub>34</sub> O <sub>1</sub> | 0.0440  | N.D.   | 0.0065  | N.D.    | Isoabienol                                   |
| 291.232954 | 291.232952 | 0.0069 | 4 | C <sub>19</sub> H <sub>32</sub> O <sub>2</sub> | N.D.    | N.D.   | 0.0147  | N.D.    | 15-Norpinifolic acid                         |
| 299.201654 | 299.201635 | 0.0652 | 7 | C <sub>20</sub> H <sub>28</sub> O <sub>2</sub> | 1.0363  | 0.8936 | 0.4583  | 0.4346  | Dehydroabiatic acid                          |
| 301.217304 | 301.217305 | 0.0026 | 6 | C <sub>20</sub> H <sub>30</sub> O <sub>2</sub> | 4.3814  | 2.6722 | 14.0433 | 14.8488 | Pimaric acid                                 |
| 301.238433 | 301.238412 | 0.0705 | 1 | C <sub>17</sub> H <sub>34</sub> O <sub>4</sub> | 0.8371  | 1.1883 | 0.6341  | 1.2170  | 2,3-Dihydroxypropyl tetradecanoate           |
| 303.232954 | 303.232931 | 0.0750 | 5 | C <sub>20</sub> H <sub>32</sub> O <sub>2</sub> | 0.2245  | 0.1072 | 0.3229  | 0.1827  | Anticopalic acid                             |
| 305.248604 | 305.248576 | 0.0925 | 4 | C <sub>20</sub> H <sub>34</sub> O <sub>2</sub> | 0.1440  | 0.2366 | 0.8551  | 0.5622  | 3- $\alpha$ -Hydroxymanool                   |
| 315.196568 | 315.196533 | 0.1102 | 7 | C <sub>20</sub> H <sub>28</sub> O <sub>3</sub> | 0.0637  | 0.1222 | 3.0093  | 0.0101  | Lambertianic acid                            |
| 317.212218 | 317.212202 | 0.1497 | 6 | C <sub>20</sub> H <sub>30</sub> O <sub>3</sub> | 0.1522  | 0.4172 | 0.0387  | 0.5830  | 12-Hydroxyabiatic acid                       |
| 319.227868 | 319.227845 | 0.0713 | 5 | C <sub>20</sub> H <sub>32</sub> O <sub>3</sub> | 0.2574  | 0.6459 | N.D.    | 0.0108  | Isocupressic acid                            |
| 321.243519 | 321.243501 | 0.0553 | 4 | C <sub>20</sub> H <sub>34</sub> O <sub>3</sub> | 0.0636  | 0.1171 | 0.2147  | 0.0256  | Imbricatolic acid (dihydroisocupressic acid) |
| 329.269733 | 329.269719 | 0.0440 | 1 | C <sub>19</sub> H <sub>38</sub> O <sub>4</sub> | 1.0562  | 1.5550 | 0.4619  | 0.3422  | 2,3-Dihydroxypropyl hexadecanoate            |
| 331.191483 | 331.191487 | 0.0128 | 7 | C <sub>20</sub> H <sub>28</sub> O <sub>4</sub> | 0.0292  | 0.1459 | 0.0088  | 0.1054  | Pinusolic acid                               |
| 335.222783 | 335.222770 | 0.0380 | 5 | C <sub>20</sub> H <sub>32</sub> O <sub>4</sub> | 0.8810  | 4.0941 | 0.0551  | 0.3944  | Pinifolic acid                               |
| 349.202048 | 349.202037 | 0.0315 | 6 | C <sub>20</sub> H <sub>30</sub> O <sub>5</sub> | 0.1645  | 0.2953 | 0.1547  | 0.1180  | Andrographolide                              |
| 357.301033 | 357.301034 | 0.0028 | 1 | C <sub>21</sub> H <sub>42</sub> O <sub>4</sub> | 1.5215  | 2.6635 | 4.2769  | N.D.    | 2,3-Dihydroxypropyl octadecanoate            |
| 361.238433 | 361.238401 | 0.0879 | 6 | C <sub>22</sub> H <sub>34</sub> O <sub>4</sub> | 0.2844  | 0.1568 | 0.9465  | 0.6259  | Acetylisocupressic acid                      |
| 385.332334 | 385.332326 | 0.0210 | 1 | C <sub>23</sub> H <sub>46</sub> O <sub>4</sub> | 2.0682  | 4.3174 | 1.5368  | 1.2646  | 2,3-dihydroxypropyl eicosanoate              |
| 413.363634 | 413.363651 | 0.0417 | 1 | C <sub>25</sub> H <sub>50</sub> O <sub>4</sub> | 2.3874  | 3.9363 | 2.1463  | 2.9763  | 2,3-dihydroxypropyl docosanoate              |

N.D. –Not detected

**Table S2.** Compounds identified with (–) ESI from conifer needle solvent extracts.

| Calculated $m/z$ [M–H] <sup>–</sup> | Observed $m/z$ [M–H] <sup>–</sup> | Error (ppm) | DBE | Elemental formula                              | Relative intensity (%) |         | Putative compound(s)        |
|-------------------------------------|-----------------------------------|-------------|-----|------------------------------------------------|------------------------|---------|-----------------------------|
|                                     |                                   |             |     |                                                | Hexane                 | Toluene |                             |
| 121.029503                          | 121.029503                        | 0.0000      | 5   | C <sub>7</sub> H <sub>6</sub> O <sub>2</sub>   | 0.0090                 | 0.0275  | Benzoic acid                |
| 137.024418                          | 137.024422                        | 0.0292      | 5   | C <sub>7</sub> H <sub>6</sub> O <sub>3</sub>   | 0.0056                 | 0.0933  | Salicylic acid              |
| 143.107753                          | 143.107757                        | 0.0280      | 1   | C <sub>8</sub> H <sub>16</sub> O <sub>2</sub>  | 0.0140                 | 0.0190  | Octanoic acid               |
| 145.087018                          | 145.087027                        | 0.0586      | 1   | C <sub>7</sub> H <sub>14</sub> O <sub>3</sub>  | 0.0107                 | 0.0492  | 2-Hydroxyheptanoic acid     |
| 149.045547                          | 149.045556                        | 0.0604      | 1   | C <sub>5</sub> H <sub>10</sub> O <sub>5</sub>  | 0.0573                 | N.D.    | Arabinose                   |
| 151.040068                          | 151.040074                        | 0.0397      | 5   | C <sub>8</sub> H <sub>8</sub> O <sub>3</sub>   | 0.0066                 | 0.0229  | 4-hydroxyphenyl acetic acid |
| 163.061197                          | 163.060648                        | 0.0552      | 1   | C <sub>6</sub> H <sub>12</sub> O <sub>5</sub>  | 0.0126                 | N.D.    | Rhamnose                    |
| 167.107753                          | 167.107770                        | 0.1017      | 3   | C <sub>10</sub> H <sub>16</sub> O <sub>2</sub> | 0.0107                 | 0.2334  | Geranic acid                |
| 171.139053                          | 171.139068                        | 0.0819      | 1   | C <sub>10</sub> H <sub>20</sub> O <sub>2</sub> | 0.0056                 | N.D.    | Decanoic acid               |
| 179.056112                          | 179.056124                        | 0.0540      | 1   | C <sub>6</sub> H <sub>12</sub> O <sub>6</sub>  | 0.2072                 | 0.0153  | Fructose                    |
| 183.102668                          | 183.102689                        | 0.0942      | 3   | C <sub>10</sub> H <sub>16</sub> O <sub>3</sub> | N.D.                   | 0.0219  | Pinonic acid                |
| 183.139053                          | 183.139068                        | 0.0518      | 2   | C <sub>11</sub> H <sub>20</sub> O <sub>2</sub> | 0.0513                 | N.D.    | Z-3-Hexenyl isovalerate     |
| 185.081932                          | 185.081942                        | 0.0906      | 3   | C <sub>9</sub> H <sub>14</sub> O <sub>4</sub>  | 0.0075                 | 0.0286  | Pinic acid                  |
| 191.056112                          | 191.056094                        | 0.0276      | 2   | C <sub>7</sub> H <sub>12</sub> O <sub>6</sub>  | 3.4664                 | 0.3052  | Quinic acid                 |
| 193.050632                          | 193.050642                        | 0.0536      | 6   | C <sub>10</sub> H <sub>10</sub> O <sub>4</sub> | N.D.                   | 0.0473  | Ferulic acid                |
| 193.071762                          | 193.071780                        | 0.0047      | 1   | C <sub>7</sub> H <sub>14</sub> O <sub>6</sub>  | 0.0523                 | 0.0637  | Pinitol                     |

|            |            |        |    |                                                 |        |         |                                              |
|------------|------------|--------|----|-------------------------------------------------|--------|---------|----------------------------------------------|
| 199.170354 | 199.170360 | 0.0813 | 1  | C <sub>12</sub> H <sub>24</sub> O <sub>2</sub>  | 0.0281 | 0.0309  | Lauric acid                                  |
| 205.159789 | 205.159778 | 0.0023 | 4  | C <sub>14</sub> H <sub>22</sub> O <sub>1</sub>  | 0.0169 | N.D.    | Alpha irone                                  |
| 213.186004 | 213.186005 | 0.1155 | 1  | C <sub>13</sub> H <sub>26</sub> O <sub>2</sub>  | 0.0063 | N.D.    | Tridecanoic acid                             |
| 215.165268 | 215.165286 | 0.1285 | 1  | C <sub>12</sub> H <sub>24</sub> O <sub>3</sub>  | 0.0185 | 0.0297  | Sabincic acid (hydroxylauric acid)           |
| 221.081932 | 221.081933 | 0.1501 | 6  | C <sub>12</sub> H <sub>14</sub> O <sub>4</sub>  | 0.0052 | 0.0159  | Dillapiole                                   |
| 225.092103 | 225.092129 | 0.1155 | 9  | C <sub>15</sub> H <sub>14</sub> O <sub>2</sub>  | 0.0337 | N.D.    | Flavon-3-ol                                  |
| 227.201654 | 227.201683 | 0.1276 | 1  | C <sub>14</sub> H <sub>28</sub> O <sub>2</sub>  | N.D.   | 0.0280  | Myristic acid                                |
| 239.201654 | 239.201709 | 0.2299 | 2  | C <sub>15</sub> H <sub>28</sub> O <sub>2</sub>  | 0.0059 | N.D.    | Methyl isovalerate                           |
| 241.217304 | 241.217335 | 0.1285 | 1  | C <sub>15</sub> H <sub>30</sub> O <sub>2</sub>  | 0.0121 | N.D.    | Pentadecanoic acid                           |
| 253.217304 | 253.217335 | 0.1501 | 2  | C <sub>16</sub> H <sub>30</sub> O <sub>2</sub>  | 0.0165 | 0.0165  | Palmitoleic acid                             |
| 255.232954 | 255.232951 | 0.0137 | 1  | C <sub>16</sub> H <sub>32</sub> O <sub>2</sub>  | 0.2940 | 0.1350  | Palmitic acid                                |
| 269.248604 | 269.248559 | 0.1671 | 1  | C <sub>17</sub> H <sub>34</sub> O <sub>2</sub>  | 0.0153 | N.D.    | Methyl palmitate                             |
| 271.227868 | 271.227872 | 0.0129 | 1  | C <sub>16</sub> H <sub>32</sub> O <sub>3</sub>  | 0.1633 | 0.2314  | Hydroxypalmitic acid                         |
| 277.217304 | 277.217325 | 0.0739 | 4  | C <sub>18</sub> H <sub>30</sub> O <sub>2</sub>  | 0.3064 | 0.0501  | Linolenic acid                               |
| 279.232954 | 279.232967 | 0.0448 | 3  | C <sub>18</sub> H <sub>32</sub> O <sub>2</sub>  | 0.0727 | 0.0281  | Linoleic acid                                |
| 281.248604 | 281.248559 | 0.0181 | 2  | C <sub>18</sub> H <sub>34</sub> O <sub>2</sub>  | 0.0357 | N.D.    | Oleic acid                                   |
| 283.264254 | 283.264232 | 0.0777 | 1  | C <sub>18</sub> H <sub>36</sub> O <sub>2</sub>  | 0.2192 | 0.0757  | Stearic acid                                 |
| 285.040462 | 285.040469 | 0.0246 | 11 | C <sub>15</sub> H <sub>10</sub> O <sub>6</sub>  | N.D.   | 0.0334  | Kaempferol                                   |
| 291.232954 | 291.232955 | 0.0034 | 4  | C <sub>19</sub> H <sub>32</sub> O <sub>2</sub>  | 0.0092 | N.D.    | 15-Norpinifolic acid                         |
| 297.279904 | 297.279948 | 0.1480 | 1  | C <sub>19</sub> H <sub>38</sub> O <sub>2</sub>  | 0.0064 | N.D.    | Nonadecanoic acid                            |
| 299.165268 | 299.165246 | 0.0735 | 8  | C <sub>19</sub> H <sub>24</sub> O <sub>3</sub>  | 0.0174 | 0.0191  | Z-Bornyl-p-coumarate                         |
| 299.201654 | 299.201619 | 0.1170 | 7  | C <sub>20</sub> H <sub>28</sub> O <sub>2</sub>  | 0.8487 | 0.6294  | Dehydroabietic acid                          |
| 301.035376 | 301.035324 | 0.1727 | 11 | C <sub>15</sub> H <sub>10</sub> O <sub>7</sub>  | N.D.   | 0.0175  | Quercetin                                    |
| 301.217304 | 301.217288 | 0.0548 | 6  | C <sub>20</sub> H <sub>30</sub> O <sub>2</sub>  | 6.7897 | 3.5646  | Abietic acid                                 |
| 301.238433 | 301.238377 | 0.1859 | 1  | C <sub>17</sub> H <sub>34</sub> O <sub>4</sub>  | 0.0877 | N.D.    | 2,3-Dihydroxypropyl tetradecanoate           |
| 303.051026 | 303.051083 | 0.1881 | 10 | C <sub>15</sub> H <sub>12</sub> O <sub>7</sub>  | N.D.   | 0.0209  | Taxifolin                                    |
| 303.232954 | 303.232900 | 0.1797 | 5  | C <sub>20</sub> H <sub>32</sub> O <sub>2</sub>  | 0.0347 | 0.0191  | Anticopalic acid                             |
| 305.248604 | 305.248533 | 0.2326 | 4  | C <sub>20</sub> H <sub>34</sub> O <sub>2</sub>  | 0.0273 | N.D.    | 3- $\alpha$ -Hydroxy manool                  |
| 311.295554 | 311.295523 | 0.0996 | 1  | C <sub>20</sub> H <sub>40</sub> O <sub>2</sub>  | 0.0661 | 0.0258  | Arachidic acid                               |
| 313.180918 | 313.180901 | 0.0559 | 8  | C <sub>20</sub> H <sub>26</sub> O <sub>3</sub>  | 0.0071 | 0.0251  | 7-Oxodehydroabietic acid                     |
| 315.051026 | 315.051018 | 0.0254 | 11 | C <sub>16</sub> H <sub>12</sub> O <sub>7</sub>  | N.D.   | 0.0502  | Isorhamnetin                                 |
| 315.196568 | 315.196534 | 0.1079 | 7  | C <sub>20</sub> H <sub>28</sub> O <sub>3</sub>  | 0.0886 | 0.1914  | Lambertianic acid                            |
| 317.212218 | 317.212208 | 0.0315 | 6  | C <sub>20</sub> H <sub>30</sub> O <sub>3</sub>  | 0.4904 | 1.1300  | 12-Hydroxyabietic acid                       |
| 319.227868 | 319.227841 | 0.0846 | 5  | C <sub>20</sub> H <sub>32</sub> O <sub>3</sub>  | 1.3126 | 2.8905  | Isocupressic acid                            |
| 321.243519 | 321.243482 | 0.1167 | 4  | C <sub>20</sub> H <sub>34</sub> O <sub>3</sub>  | 0.1606 | 0.4492  | Imbricatolic acid (dihydroisocupressic acid) |
| 329.269733 | 329.269684 | 0.1488 | 1  | C <sub>19</sub> H <sub>38</sub> O <sub>4</sub>  | 0.0118 | 0.2700  | 2,3-Dihydroxypropyl hexadecanoate            |
| 331.191483 | 331.191442 | 0.1238 | 7  | C <sub>20</sub> H <sub>28</sub> O <sub>4</sub>  | 0.0465 | N.D.    | Pinusolic acid                               |
| 333.207133 | 333.207094 | 0.1185 | 6  | C <sub>20</sub> H <sub>30</sub> O <sub>4</sub>  | 9.5100 | 10.8080 | Dehydropinifolic acid                        |
| 335.222783 | 335.222739 | 0.1313 | 5  | C <sub>20</sub> H <sub>32</sub> O <sub>4</sub>  | 8.4787 | 27.8598 | Pinifolic acid                               |
| 339.326854 | 339.326797 | 0.1695 | 1  | C <sub>22</sub> H <sub>44</sub> O <sub>2</sub>  | 0.0516 | 0.0178  | Behenic acid                                 |
| 341.108935 | 341.108914 | 0.0616 | 2  | C <sub>12</sub> H <sub>22</sub> O <sub>11</sub> | 0.1491 | 0.0586  | Sucrose                                      |
| 345.207133 | 345.207115 | 0.0521 | 7  | C <sub>21</sub> H <sub>30</sub> O <sub>4</sub>  | 0.0358 | 0.0442  | Pinusolide                                   |
| 349.202048 | 349.202019 | 0.0845 | 6  | C <sub>20</sub> H <sub>30</sub> O <sub>5</sub>  | 0.1486 | 0.4292  | Andrographolide                              |

|            |            |        |    |                                                 |         |         |                                                                        |
|------------|------------|--------|----|-------------------------------------------------|---------|---------|------------------------------------------------------------------------|
| 349.238433 | 349.238396 | 0.1059 | 5  | C <sub>21</sub> H <sub>34</sub> O <sub>4</sub>  | 33.1969 | 44.5993 | Methyl pinifolate                                                      |
| 353.342504 | 353.342436 | 0.1924 | 1  | C <sub>23</sub> H <sub>46</sub> O <sub>2</sub>  | 0.0067  | N.D.    | Tricosanoic acid                                                       |
| 355.321769 | 355.321733 | 0.1027 | 1  | C <sub>22</sub> H <sub>44</sub> O <sub>3</sub>  | 0.0238  | 0.0494  | Hydroxydocosanoic acid                                                 |
| 357.134362 | 357.134358 | 0.0112 | 10 | C <sub>20</sub> H <sub>22</sub> O <sub>6</sub>  | N.D.    | 0.0440  | Matairesinol                                                           |
| 357.301033 | 357.300986 | 0.1315 | 1  | C <sub>21</sub> H <sub>42</sub> O <sub>4</sub>  | 0.0049  | 0.0193  | 2,3-Dihydroxypropyl octadecanoate                                      |
| 361.238433 | 361.238406 | 0.0747 | 6  | C <sub>22</sub> H <sub>34</sub> O <sub>4</sub>  | 2.3195  | 1.6923  | Acetylisocupressic acid                                                |
| 363.254083 | 363.254057 | 0.0730 | 5  | C <sub>22</sub> H <sub>36</sub> O <sub>4</sub>  | 0.7503  | 1.1065  | Dimethyl pinifolate                                                    |
| 365.196962 | 365.196957 | 0.0137 | 6  | C <sub>20</sub> H <sub>30</sub> O <sub>6</sub>  | 1.0325  | N.D.    | 7-Oxo-12 $\alpha$ ,13 $\beta$ ,15-trihydroxyabiet-8(14)-en-18-oic acid |
| 371.11950  | 371.119478 | 0.0593 | 2  | C <sub>13</sub> H <sub>24</sub> O <sub>12</sub> | 4.9789  | N.D.    | 6-O-Heptopyranosyl-d-glucopyranose                                     |
| 373.129277 | 373.129310 | 0.0643 | 10 | C <sub>20</sub> H <sub>22</sub> O <sub>7</sub>  | N.D.    | 0.0244  | Hydroxymatairesinol                                                    |
| 381.373804 | 381.373829 | 0.0656 | 1  | C <sub>25</sub> H <sub>50</sub> O <sub>2</sub>  | 0.0063  | N.D.    | Pentacosanoic acid                                                     |
| 385.332334 | 385.332301 | 0.0830 | 1  | C <sub>23</sub> H <sub>46</sub> O <sub>4</sub>  | 0.0719  | 0.2834  | 2,3-Dihydroxypropyl eicosanoate                                        |
| 395.389454 | 395.389407 | 0.1189 | 1  | C <sub>26</sub> H <sub>52</sub> O <sub>2</sub>  | 0.0175  | N.D.    | Hexacosanoic acid                                                      |
| 409.259562 | 409.259559 | 0.0073 | 5  | C <sub>23</sub> H <sub>38</sub> O <sub>6</sub>  | 23.8423 | 1.6595  | Vitetrifolin D                                                         |
| 413.363634 | 413.363648 | 0.0339 | 1  | C <sub>25</sub> H <sub>50</sub> O <sub>4</sub>  | 0.0327  | 0.1216  | 2,3-Dihydroxypropyl docosanoate                                        |
| 419.243912 | 419.243883 | 0.0704 | 7  | C <sub>24</sub> H <sub>36</sub> O <sub>6</sub>  | 0.0841  | 0.2778  | Succinylisocupressic acid                                              |
| 423.420755 | 423.420773 | 0.0425 | 1  | C <sub>28</sub> H <sub>56</sub> O <sub>2</sub>  | 0.0287  | N.D.    | Octacosanoic acid                                                      |
| 451.452055 | 451.452026 | 0.0642 | 1  | C <sub>30</sub> H <sub>60</sub> O <sub>2</sub>  | 0.0320  | N.D.    | Triacosanoic acid                                                      |
| 463.08820  | 463.088170 | 0.0648 | 12 | C <sub>21</sub> H <sub>20</sub> O <sub>12</sub> | 0.0071  | N.D.    | Isoquercetin                                                           |
| 479.483355 | 479.483310 | 0.0939 | 1  | C <sub>32</sub> H <sub>64</sub> O <sub>2</sub>  | 0.0103  | N.D.    | Dotriacontanoic acid                                                   |
| 503.161758 | 503.161703 | 0.1093 | 3  | C <sub>18</sub> H <sub>32</sub> O <sub>16</sub> | 0.0087  | N.D.    | Raffinose                                                              |

N.D. –Not detected

**Table S3.** Compounds identified with (+) APPI from conifer needle essential oils

| Calculated<br><i>m/z</i> [M+H] <sup>+</sup> | Observed<br><i>m/z</i> [M+H] <sup>+</sup> | Error<br>(ppm) | DBE | Elemental<br>formula                           | Relative intensity (%) |         |        |         | Putative compound(s)                                 |
|---------------------------------------------|-------------------------------------------|----------------|-----|------------------------------------------------|------------------------|---------|--------|---------|------------------------------------------------------|
|                                             |                                           |                |     |                                                | Pine                   | Spruce  | Larch  | Juniper |                                                      |
| 121.101177                                  | 121.101168                                | 0.0716         | 4   | C <sub>9</sub> H <sub>12</sub>                 | 0.9168                 | 1.0286  | 0.4138 | 1.0538  | 1,2,4-Trimethylbenzene                               |
| 133.101177                                  | 133.101175                                | 0.0175         | 5   | C <sub>10</sub> H <sub>12</sub>                | 0.1279                 | 0.1079  | 0.2609 | 0.1249  | 3,5-Dimethylstyrene                                  |
| 135.080441                                  | 135.080446                                | 0.0370         | 5   | C <sub>9</sub> H <sub>10</sub> O <sub>1</sub>  | 0.0348                 | 0.0289  | 0.1455 | 0.0129  | Chavicol                                             |
| 135.116827                                  | 135.116826                                | 0.0074         | 4   | C <sub>10</sub> H <sub>14</sub>                | 0.4837                 | 2.0141  | 0.4364 | 0.9049  | Verbenene                                            |
| 137.132477                                  | 137.132464                                | 0.0972         | 3   | C <sub>10</sub> H <sub>16</sub>                | 5.9086                 | 21.0899 | 0.5062 | 11.0749 | Pinene                                               |
| 139.111742                                  | 139.111740                                | 0.0144         | 3   | C <sub>9</sub> H <sub>14</sub> O <sub>1</sub>  | 0.0640                 | 3.5497  | 0.1218 | 0.0714  | Sebina Ketone                                        |
| 149.096091                                  | 149.096079                                | 0.0827         | 5   | C <sub>10</sub> H <sub>12</sub> O <sub>1</sub> | 0.0973                 | 0.0693  | 0.1944 | 0.0694  | Methyl chavicol                                      |
| 151.111742                                  | 151.111719                                | 0.1522         | 4   | C <sub>10</sub> H <sub>14</sub> O <sub>1</sub> | 1.6385                 | 0.8118  | 1.1858 | 0.3063  | Verbenone                                            |
| 153.127392                                  | 153.127376                                | 0.1023         | 3   | C <sub>10</sub> H <sub>16</sub> O <sub>1</sub> | 0.2257                 | 4.7042  | 0.2309 | 0.4604  | Methyl thymol, Thujone, Piperitone                   |
| 155.143042                                  | 155.143032                                | 0.0677         | 2   | C <sub>10</sub> H <sub>18</sub> O <sub>1</sub> | N.D.                   | 0.1961  | N.D.   | 0.0114  | Borneol, Citronellal, Eucalyptol, linalool, Caraneol |
| 161.132477                                  | 161.132444                                | 0.2027         | 5   | C <sub>12</sub> H <sub>16</sub>                | 2.2558                 | 1.1657  | 9.6802 | 6.1491  | 3-Methyl-2-phenyl-2-pentene                          |
| 163.075356                                  | 163.075350                                | 0.0399         | 6   | C <sub>10</sub> H <sub>10</sub> O <sub>2</sub> | N.D.                   | 0.0605  | 0.0460 | 0.0107  | Safole                                               |
| 165.091006                                  | 165.091005                                | 0.0081         | 5   | C <sub>10</sub> H <sub>12</sub> O <sub>2</sub> | 0.0955                 | 0.0486  | 0.2249 | 0.0408  | 2-Phenylethyl acetate                                |
| 165.127392                                  | 165.127384                                | 0.0515         | 4   | C <sub>11</sub> H <sub>16</sub> O <sub>1</sub> | 0.0620                 | 0.0647  | 0.0956 | 0.0679  | Thymol methyl ether                                  |
| 167.106656                                  | 167.106653                                | 0.0160         | 4   | C <sub>10</sub> H <sub>14</sub> O <sub>2</sub> | 0.2318                 | 0.1488  | 0.6396 | 0.0608  | Perillic acid                                        |
| 169.122306                                  | 169.122300                                | 0.0335         | 3   | C <sub>10</sub> H <sub>16</sub> O <sub>2</sub> | 0.0606                 | 0.2716  | 0.3167 | 0.0847  | Geranic acid                                         |
| 171.137956                                  | 171.137952                                | 0.0263         | 2   | C <sub>10</sub> H <sub>18</sub> O <sub>2</sub> | N.D.                   | 0.0453  | 0.0090 | 0.0374  | Citronellic acid                                     |

|            |            |        |    |                                                |         |         |         |         |                                              |
|------------|------------|--------|----|------------------------------------------------|---------|---------|---------|---------|----------------------------------------------|
| 179.106656 | 179.106657 | 0.0037 | 5  | C <sub>11</sub> H <sub>14</sub> O <sub>2</sub> | 0.0159  | 0.0351  | 0.0825  | 0.0208  | Methyl eugenol                               |
| 181.085921 | 181.085915 | 0.0331 | 5  | C <sub>10</sub> H <sub>12</sub> O <sub>3</sub> | N.D.    | 0.0096  | 0.0670  | N.D.    | Coniferyl alcohol                            |
| 183.137956 | 183.137943 | 0.0710 | 3  | C <sub>11</sub> H <sub>18</sub> O <sub>2</sub> | 0.0345  | 0.0890  | 0.0523  | 0.0565  | Geranyl formate                              |
| 193.085921 | 193.085900 | 0.1088 | 6  | C <sub>11</sub> H <sub>12</sub> O <sub>3</sub> | N.D.    | N.D.    | 0.0129  | N.D.    | Myristicin                                   |
| 193.122306 | 193.122302 | 0.0207 | 5  | C <sub>12</sub> H <sub>16</sub> O <sub>2</sub> | 0.0670  | 0.1862  | 0.3605  | 0.0532  | $\beta$ -Phenylethyl isobutyrate             |
| 197.153606 | 197.153568 | 0.1927 | 3  | C <sub>12</sub> H <sub>20</sub> O <sub>2</sub> | N.D.    | 0.0062  | 0.0080  | N.D.    | Geranyl acetate                              |
| 201.163777 | 201.163745 | 0.1591 | 6  | C <sub>15</sub> H <sub>20</sub>                | 0.6235  | 0.2380  | 0.7323  | 0.1514  | Calorene                                     |
| 203.179427 | 203.179378 | 0.2428 | 5  | C <sub>15</sub> H <sub>22</sub>                | 2.7711  | 4.2812  | 2.1884  | 1.8958  | Calamenene                                   |
| 205.158692 | 205.158671 | 0.1024 | 5  | C <sub>14</sub> H <sub>20</sub> O <sub>1</sub> | 2.7894  | 0.8269  | 1.9393  | 0.0915  | Khusimone                                    |
| 205.195077 | 205.195005 | 0.3509 | 4  | C <sub>15</sub> H <sub>24</sub>                | 56.4577 | 32.5175 | 56.6424 | 58.6900 | Germacrene D, Caryophyllene                  |
| 207.137956 | 207.137956 | 0.0016 | 5  | C <sub>13</sub> H <sub>18</sub> O <sub>2</sub> | 0.1590  | 0.1029  | 0.2404  | 0.0416  | 3-Methyl-2-phenylethyl ester                 |
| 207.174342 | 207.174319 | 0.1110 | 4  | C <sub>14</sub> H <sub>22</sub> O              | 2.4766  | 0.4495  | 3.9191  | 2.2276  | Alpha iron                                   |
| 209.117221 | 209.117204 | 0.0829 | 5  | C <sub>12</sub> H <sub>16</sub> O <sub>3</sub> | N.D.    | 0.0538  | 0.1549  | 0.0299  | Pinchotene acetate                           |
| 211.169256 | 211.169248 | 0.0395 | 3  | C <sub>13</sub> H <sub>22</sub> O <sub>2</sub> | 0.0245  | 0.0905  | 0.0486  | 0.0191  | Isobornyl propanoate                         |
| 217.158692 | 217.158686 | 0.0299 | 6  | C <sub>15</sub> H <sub>20</sub> O <sub>1</sub> | 1.3740  | 0.5028  | 1.6941  | 0.2251  | Hexyl cinnamaldehyde                         |
| 217.195077 | 217.195069 | 0.0353 | 5  | C <sub>16</sub> H <sub>24</sub>                | 1.5713  | 3.1080  | 0.1362  | 5.4005  | Vulgraon B                                   |
| 219.174342 | 219.174303 | 0.1779 | 5  | C <sub>15</sub> H <sub>22</sub> O <sub>1</sub> | 7.0388  | 2.8140  | 8.1671  | 1.1068  | Nootkatone                                   |
| 221.153606 | 221.153593 | 0.0573 | 5  | C <sub>14</sub> H <sub>20</sub> O <sub>2</sub> | 1.1009  | 0.1587  | 1.5341  | 0.0915  | Phenylethyl hexanoate                        |
| 221.189992 | 221.189962 | 0.1341 | 4  | C <sub>15</sub> H <sub>24</sub> O <sub>1</sub> | 3.0924  | 5.9276  | 2.5463  | 2.1145  | Caryophyllene oxide, Farnasal, Spathulenol   |
| 223.075356 | 223.075371 | 0.0672 | 11 | C <sub>15</sub> H <sub>10</sub> O <sub>2</sub> | N.D.    | 0.0062  | N.D.    | N.D.    | Aurone, Flavone                              |
| 223.096485 | 223.096450 | 0.1569 | 6  | C <sub>12</sub> H <sub>14</sub> O <sub>4</sub> | N.D.    | 0.0082  | 0.0254  | N.D.    | Apiole                                       |
| 223.205642 | 223.205644 | 0.0105 | 3  | C <sub>15</sub> H <sub>26</sub> O <sub>1</sub> | 0.0408  | 0.0958  | 0.2454  | 0.0931  | Germacrene D-4-ol                            |
| 225.184906 | 225.184889 | 0.0755 | 3  | C <sub>14</sub> H <sub>24</sub> O <sub>2</sub> | 0.0206  | 0.0467  | 0.0517  | 0.0226  | Bornyl isobutyrate                           |
| 237.184906 | 237.184902 | 0.0169 | 4  | C <sub>15</sub> H <sub>24</sub> O <sub>2</sub> | 1.6275  | 0.6122  | 1.7964  | 0.4036  | Myrtenyl isovalerate                         |
| 239.164171 | 239.164157 | 0.0599 | 4  | C <sub>14</sub> H <sub>22</sub> O <sub>3</sub> | 0.0939  | 0.0273  | 0.3354  | 0.0297  | Pinchotene acetate                           |
| 239.200557 | 239.200565 | 0.0334 | 3  | C <sub>15</sub> H <sub>26</sub> O <sub>2</sub> | 0.0261  | 0.0883  | 0.0389  | 0.0397  | Bornyl-2-methylbutyrate                      |
| 255.210727 | 255.210745 | 0.0705 | 7  | C <sub>19</sub> H <sub>26</sub>                | N.D.    | 0.2620  | 0.1356  | 0.2895  | Norabieta-4(18),8,11,13-tetraene             |
| 257.226377 | 257.226391 | 0.0557 | 6  | C <sub>19</sub> H <sub>28</sub>                | N.D.    | 1.3167  | 0.1103  | 0.3278  | Norabietatriene                              |
| 271.242027 | 271.241958 | 0.2532 | 6  | C <sub>20</sub> H <sub>30</sub>                | 0.9916  | 2.1543  | 0.2152  | 2.0669  | Abieta-8,11,13-triene                        |
| 273.257677 | 273.257649 | 0.1025 | 5  | C <sub>20</sub> H <sub>32</sub>                | 2.8188  | 4.9122  | 0.1459  | 1.3402  | Abietadiene                                  |
| 285.221292 | 285.221284 | 0.0269 | 7  | C <sub>20</sub> H <sub>28</sub> O <sub>1</sub> | 0.3728  | 0.3426  | 0.2719  | 0.2837  | Dehydroabietal                               |
| 287.236942 | 287.236908 | 0.1184 | 6  | C <sub>20</sub> H <sub>30</sub> O <sub>1</sub> | 0.7638  | 1.2838  | 0.3542  | 0.9583  | Ferruginol                                   |
| 289.252592 | 289.252589 | 0.0104 | 5  | C <sub>20</sub> H <sub>32</sub> O <sub>1</sub> | 0.2117  | 0.6814  | 0.0950  | 0.3281  | Isopimarol                                   |
| 291.268242 | 291.268250 | 0.0257 | 4  | C <sub>20</sub> H <sub>34</sub> O <sub>1</sub> | N.D.    | 0.0314  | 0.0132  | 0.0310  | Isoabienal                                   |
| 293.247507 | 293.247523 | 0.0529 | 4  | C <sub>19</sub> H <sub>32</sub> O <sub>2</sub> | N.D.    | 0.0111  | 0.0088  | 0.0084  | 15-Norpinifolic acid                         |
| 301.179821 | 301.179831 | 0.0321 | 8  | C <sub>19</sub> H <sub>24</sub> O <sub>3</sub> | 0.0305  | 0.0261  | 0.0085  | 0.0653  | Z-Bornyl-p-coumarate                         |
| 303.231857 | 303.231830 | 0.0890 | 6  | C <sub>20</sub> H <sub>30</sub> O <sub>2</sub> | 0.4327  | 0.3394  | 0.3379  | 0.2148  | Abietic acid                                 |
| 305.247507 | 305.247468 | 0.1278 | 5  | C <sub>20</sub> H <sub>32</sub> O <sub>2</sub> | 0.0579  | 0.3791  | 0.2433  | 0.1525  | Anticypalic acid                             |
| 315.231857 | 315.231865 | 0.0254 | 7  | C <sub>21</sub> H <sub>30</sub> O <sub>2</sub> | 0.0935  | 0.1261  | 0.1918  | 0.0381  | Methyl dehydroabietate                       |
| 317.211121 | 317.211118 | 0.0095 | 7  | C <sub>20</sub> H <sub>28</sub> O <sub>3</sub> | 0.1307  | 0.0626  | 0.0367  | 0.1696  | Lambertianic acid                            |
| 319.226771 | 319.226527 | 0.0052 | 6  | C <sub>20</sub> H <sub>30</sub> O <sub>3</sub> | 0.1944  | 0.0907  | 0.0353  | 0.1792  | 3-Oxoanticypalic acid                        |
| 317.247507 | 319.263769 | 0.0620 | 6  | C <sub>21</sub> H <sub>32</sub> O <sub>2</sub> | 0.0326  | 0.0618  | 0.0761  | 0.0298  | Methyl sandaracopimarate                     |
| 319.263157 | 319.263165 | 0.0261 | 5  | C <sub>21</sub> H <sub>34</sub> O <sub>2</sub> | 0.0326  | 0.0334  | 0.0227  | 0.0427  | Methyl arachidonate                          |
| 321.242421 | 321.242394 | 0.0830 | 5  | C <sub>20</sub> H <sub>32</sub> O <sub>3</sub> | 0.0876  | 0.0685  | 0.0238  | N.D.    | Isocupressic acid                            |
| 323.258071 | 323.258082 | 0.0340 | 4  | C <sub>20</sub> H <sub>34</sub> O <sub>3</sub> | N.D.    | 0.0247  | N.D.    | 0.0249  | Imbricatolic acid (dihydroisocupressic acid) |
| 331.226771 | 331.226784 | 0.0392 | 7  | C <sub>21</sub> H <sub>30</sub> O <sub>3</sub> | 0.0431  | 0.0315  | 0.0914  | 0.0099  | Methyl daniellate                            |
| 333.206036 | 333.206998 | 0.1150 | 7  | C <sub>20</sub> H <sub>28</sub> O <sub>4</sub> | 0.0542  | 0.0194  | 0.0088  | 0.0733  | Pinosolide                                   |

|            |            |        |   |                                                |        |        |        |        |                        |
|------------|------------|--------|---|------------------------------------------------|--------|--------|--------|--------|------------------------|
| 337.237336 | 337.237326 | 0.0297 | 5 | C <sub>20</sub> H <sub>32</sub> O <sub>4</sub> | 0.0222 | 0.0279 | 0.0241 | N.D.   | Pinifolic acid         |
| 351.216601 | 351.216617 | 0.0456 | 6 | C <sub>20</sub> H <sub>30</sub> O <sub>5</sub> | 0.0207 | 0.0076 | 0.0224 | N.D.   | Andrographolide        |
| 363.252986 | 363.252934 | 0.1432 | 6 | C <sub>22</sub> H <sub>34</sub> O <sub>4</sub> | N.D.   | 0.0177 | N.D.   | 0.0194 | Acetyliscupressic acid |

N.D. –Not detected

**Table S4.** Compounds identified with (+) APPI from conifer needle solvent extracts

| Calculated<br><i>m/z</i> [M] <sup>++</sup> | Observed<br><i>m/z</i> [M] <sup>++</sup> | Error<br>(ppm) | DBE | Elemental<br>formula                           | Relative intensity (%) |         | Putative compound(s)                     |
|--------------------------------------------|------------------------------------------|----------------|-----|------------------------------------------------|------------------------|---------|------------------------------------------|
|                                            |                                          |                |     |                                                | Hexane                 | Toluene |                                          |
| 134.072616                                 | 134.072608                               | 0.0597         | 5   | C <sub>9</sub> H <sub>10</sub> O <sub>1</sub>  | 0.0219                 | N.D.    | Chavicol                                 |
| 134.109002                                 | 134.109005                               | 0.0186         | 4   | C <sub>10</sub> H <sub>14</sub>                | 0.2152                 | 0.1316  | Verbenene                                |
| 136.124652                                 | 136.124654                               | 0.0110         | 3   | C <sub>10</sub> H <sub>16</sub>                | 0.3829                 | 0.1208  | Pinene                                   |
| 138.103916                                 | 138.103922                               | 0.0434         | 3   | C <sub>9</sub> H <sub>14</sub> O <sub>1</sub>  | N.D.                   | 0.0137  | Sabina ketone                            |
| 148.088266                                 | 148.088252                               | 0.0945         | 5   | C <sub>10</sub> H <sub>12</sub> O <sub>1</sub> | 0.0423                 | 0.0242  | Methyl chavicol                          |
| 150.103916                                 | 150.103912                               | 0.0266         | 4   | C <sub>10</sub> H <sub>14</sub> O <sub>1</sub> | 0.0469                 | 0.0363  | Verbenone                                |
| 152.119567                                 | 152.119559                               | 0.0559         | 3   | C <sub>10</sub> H <sub>16</sub> O <sub>1</sub> | 0.0235                 | 0.0244  | Methyl thymol, Thujone, Piperitone,      |
| 162.067531                                 | 162.067537                               | 0.0370         | 6   | C <sub>10</sub> H <sub>10</sub> O <sub>2</sub> | 0.0239                 | 0.0137  | Safrole                                  |
| 164.083181                                 | 164.083170                               | 0.0701         | 5   | C <sub>10</sub> H <sub>12</sub> O <sub>2</sub> | 0.0280                 | 0.0152  | 2-Phenylethyl acetate                    |
| 164.119567                                 | 164.119580                               | 0.0792         | 4   | C <sub>11</sub> H <sub>16</sub> O <sub>1</sub> | 0.0387                 | 0.0251  | Thymol methyl ether                      |
| 166.098831                                 | 166.098834                               | 0.0151         | 4   | C <sub>10</sub> H <sub>14</sub> O <sub>2</sub> | 0.0940                 | 0.0675  | Perillic acid                            |
| 168.114481                                 | 168.114484                               | 0.0149         | 3   | C <sub>10</sub> H <sub>16</sub> O <sub>2</sub> | 0.0625                 | 0.0465  | Geranic acid                             |
| 178.098831                                 | 178.098832                               | 0.0028         | 5   | C <sub>11</sub> H <sub>14</sub> O <sub>2</sub> | 0.0440                 | 0.0257  | Methyl eugenol                           |
| 180.078096                                 | 180.078100                               | 0.0222         | 5   | C <sub>10</sub> H <sub>12</sub> O <sub>3</sub> | 0.0362                 | 0.0272  | Coniferyl alcohol                        |
| 182.130131                                 | 182.130140                               | 0.0467         | 3   | C <sub>11</sub> H <sub>18</sub> O <sub>2</sub> | 0.0474                 | 0.0360  | Geranyl formate                          |
| 192.114481                                 | 192.114489                               | 0.0390         | 5   | C <sub>12</sub> H <sub>16</sub> O <sub>2</sub> | 0.0413                 | 0.0300  | β-Phenylethyl isobutyrate                |
| 200.155952                                 | 200.155948                               | 0.0200         | 6   | C <sub>15</sub> H <sub>20</sub>                | 0.0973                 | 0.0687  | Calorene                                 |
| 202.171602                                 | 202.171604                               | 0.0099         | 5   | C <sub>15</sub> H <sub>22</sub>                | 0.2410                 | 0.1885  | Calamenene                               |
| 204.150867                                 | 204.150861                               | 0.0294         | 5   | C <sub>14</sub> H <sub>20</sub> O <sub>1</sub> | 0.0846                 | 0.0549  | Khusimone                                |
| 204.187252                                 | 204.187263                               | 0.0514         | 4   | C <sub>15</sub> H <sub>24</sub>                | 3.9589                 | 3.0658  | Germacrene D, Caryophyllene              |
| 206.130131                                 | 206.130141                               | 0.0485         | 5   | C <sub>13</sub> H <sub>18</sub> O <sub>2</sub> | 0.1365                 | 0.1051  | Phenylethyl isovalerate                  |
| 206.166517                                 | 206.166508                               | 0.0437         | 4   | C <sub>14</sub> H <sub>22</sub> O <sub>1</sub> | 0.1094                 | 0.0560  | Alpha iron                               |
| 208.109396                                 | 208.109415                               | 0.0913         | 5   | C <sub>12</sub> H <sub>16</sub> O <sub>3</sub> | N.D.                   | 0.0452  | Pinchotene acetate                       |
| 216.150867                                 | 216.150872                               | 0.0231         | 6   | C <sub>15</sub> H <sub>20</sub> O <sub>1</sub> | 0.1767                 | 0.1206  | Hexyl cinnamaldehyde                     |
| 218.166517                                 | 218.166504                               | 0.0596         | 5   | C <sub>15</sub> H <sub>22</sub> O <sub>1</sub> | 0.0790                 | 0.0487  | Nootkatone                               |
| 220.145781                                 | 220.145782                               | 0.0045         | 5   | C <sub>14</sub> H <sub>20</sub> O <sub>2</sub> | 0.2837                 | 0.2432  | Phenylethyl hexanoate                    |
| 220.182167                                 | 220.182167                               | 0.0000         | 4   | C <sub>15</sub> H <sub>24</sub> O <sub>1</sub> | 0.1338                 | 0.0899  | Caryophlene oxide, Farnasal, Spathulenol |
| 222.067531                                 | 222.067501                               | 0.1373         | 6   | C <sub>15</sub> H <sub>10</sub> O <sub>2</sub> | 0.0367                 | 0.0268  | Aurone, Flavone                          |
| 222.197817                                 | 222.197810                               | 0.0315         | 3   | C <sub>15</sub> H <sub>26</sub> O <sub>1</sub> | 0.1482                 | 0.0515  | Germacrene D-4-ol                        |
| 224.177081                                 | 224.177137                               | 0.2498         | 3   | C <sub>14</sub> H <sub>24</sub> O <sub>2</sub> | 0.0249                 | 0.0000  | Bornyl isobutyrate                       |
| 234.161431                                 | 234.161425                               | 0.0256         | 5   | C <sub>15</sub> H <sub>22</sub> O <sub>2</sub> | 0.2303                 | 0.1844  | Polygodial                               |
| 236.177081                                 | 236.177079                               | 0.0106         | 4   | C <sub>15</sub> H <sub>24</sub> O <sub>2</sub> | 0.2438                 | 0.2002  | Myrtenyl isovalerate                     |
| 238.156346                                 | 238.156319                               | 0.1155         | 4   | C <sub>14</sub> H <sub>22</sub> O <sub>3</sub> | 0.0226                 | 0.0135  | Pinchotene acetate                       |
| 254.202902                                 | 254.202904                               | 0.0079         | 7   | C <sub>19</sub> H <sub>26</sub>                | 1.1065                 | 0.9565  | Norabieta-4(18),8,11,13-tetraene         |

|            |            |        |   |                                                |         |         |                                                          |
|------------|------------|--------|---|------------------------------------------------|---------|---------|----------------------------------------------------------|
| 256.218552 | 256.218563 | 0.0429 | 6 | C <sub>19</sub> H <sub>28</sub>                | 0.4677  | 1.7426  | Norabietatriene                                          |
| 270.234202 | 270.234212 | 0.0370 | 6 | C <sub>20</sub> H <sub>30</sub>                | 0.1482  | 0.1128  | Abieta-8,11,13-triene                                    |
| 272.249852 | 272.249865 | 0.0478 | 5 | C <sub>20</sub> H <sub>32</sub>                | 5.3297  | 4.0430  | Abietadiene                                              |
| 284.213467 | 284.213473 | 0.0194 | 7 | C <sub>20</sub> H <sub>28</sub> O <sub>1</sub> | 0.6454  | 0.5597  | Dehydroabietal                                           |
| 286.229117 | 286.229121 | 0.0122 | 6 | C <sub>20</sub> H <sub>30</sub> O <sub>1</sub> | 0.5142  | 0.3811  | Ferruginol                                               |
| 288.244767 | 288.244751 | 0.0572 | 5 | C <sub>20</sub> H <sub>32</sub> O <sub>1</sub> | 0.4556  | 0.3226  | Isopimarol                                               |
| 290.260417 | 290.260411 | 0.0207 | 4 | C <sub>20</sub> H <sub>34</sub> O <sub>1</sub> | 2.2275  | 1.6607  | Isoabienol                                               |
| 292.239682 | 292.239679 | 0.0120 | 4 | C <sub>19</sub> H <sub>32</sub> O <sub>2</sub> | 0.4933  | 0.5583  | 15-Norpinifolic acid                                     |
| 300.171996 | 300.171965 | 0.1033 | 8 | C <sub>19</sub> H <sub>24</sub> O <sub>3</sub> | 0.1481  | 0.0998  | Z-Bornyl-p-coumarate                                     |
| 300.208382 | 300.208370 | 0.0416 | 7 | C <sub>20</sub> H <sub>28</sub> O <sub>2</sub> | 4.8995  | 5.5528  | Dehydroabietic acid                                      |
| 302.224032 | 302.223991 | 0.1373 | 6 | C <sub>20</sub> H <sub>30</sub> O <sub>2</sub> | 40.8471 | 45.5916 | Abietic acid                                             |
| 304.239682 | 304.239697 | 0.0493 | 5 | C <sub>20</sub> H <sub>32</sub> O <sub>2</sub> | 1.3418  | 1.0819  | Anticopalic acid                                         |
| 314.187646 | 314.187635 | 0.0366 | 8 | C <sub>20</sub> H <sub>26</sub> O <sub>3</sub> | 0.2962  | 0.2178  | 7-Oxodehydroabietic acid                                 |
| 314.224032 | 314.224027 | 0.0159 | 7 | C <sub>21</sub> H <sub>30</sub> O <sub>2</sub> | 2.6948  | 2.3663  | Methyl dehydroabietate                                   |
| 316.203296 | 316.203295 | 0.0032 | 7 | C <sub>20</sub> H <sub>28</sub> O <sub>3</sub> | 3.0338  | 2.0948  | Lambertianic acid                                        |
| 316.239682 | 316.239666 | 0.0522 | 6 | C <sub>21</sub> H <sub>32</sub> O <sub>2</sub> | 0.2248  | 0.2072  | Methyl sandaracopimarate                                 |
| 318.218946 | 318.218948 | 0.0047 | 6 | C <sub>20</sub> H <sub>30</sub> O <sub>3</sub> | 2.6830  | 2.6527  | 3-Oxoanticopalic acid                                    |
| 318.255332 | 318.255347 | 0.0471 | 5 | C <sub>21</sub> H <sub>34</sub> O <sub>2</sub> | 0.0560  | 0.0827  | Methyl arachidonate                                      |
| 320.234596 | 320.234612 | 0.0500 | 5 | C <sub>20</sub> H <sub>32</sub> O <sub>3</sub> | 1.6867  | 1.5772  | Isocupressic acid                                        |
| 322.250246 | 322.250263 | 0.0528 | 4 | C <sub>20</sub> H <sub>34</sub> O <sub>3</sub> | 0.0688  | 0.0504  | Imbricatolic acid (dihydroisocupressic acid)             |
| 330.218946 | 330.218919 | 0.0818 | 7 | C <sub>21</sub> H <sub>30</sub> O <sub>3</sub> | 0.1521  | 0.1060  | Methyl daniellate                                        |
| 332.198211 | 332.198188 | 0.0707 | 7 | C <sub>20</sub> H <sub>28</sub> O <sub>4</sub> | 0.3339  | 0.2482  | Pinusolic acid                                           |
| 332.234596 | 332.234598 | 0.0045 | 6 | C <sub>21</sub> H <sub>32</sub> O <sub>3</sub> | 5.5126  | 5.9585  | 12-Methoxy-6 $\alpha$ ,11-dihydroxyabieta-8,11,13-triene |
| 334.213861 | 334.213891 | 0.0883 | 6 | C <sub>20</sub> H <sub>30</sub> O <sub>4</sub> | 2.6595  | 1.7846  | Dehydropinifolic acid                                    |
| 336.229511 | 336.229518 | 0.0193 | 5 | C <sub>20</sub> H <sub>32</sub> O <sub>4</sub> | 1.4024  | 1.7652  | Pinifolic acid                                           |
| 346.213861 | 346.213891 | 0.1126 | 7 | C <sub>21</sub> H <sub>30</sub> O <sub>4</sub> | 0.1044  | 0.0957  | Pinusolide                                               |
| 350.208775 | 350.208760 | 0.0428 | 6 | C <sub>20</sub> H <sub>30</sub> O <sub>5</sub> | 0.0554  | 0.0499  | Andrographolide                                          |
| 350.245161 | 350.245133 | 0.0785 | 5 | C <sub>21</sub> H <sub>34</sub> O <sub>4</sub> | 12.8697 | 12.5939 | Methyl pinifolate                                        |
| 362.245161 | 362.245159 | 0.0055 | 6 | C <sub>22</sub> H <sub>34</sub> O <sub>4</sub> | 0.2316  | 0.2039  | Acetylisocupressic acid                                  |
| 414.385618 | 414.385526 | 0.2232 | 5 | C <sub>29</sub> H <sub>50</sub> O <sub>1</sub> | 0.0558  | 0.0372  | $\beta$ -Sitosterol                                      |
| 430.380532 | 430.380463 | 0.1615 | 5 | C <sub>29</sub> H <sub>50</sub> O <sub>2</sub> | 0.0555  | 0.0181  | Tocopherol                                               |
| 446.339061 | 446.339044 | 0.0381 | 6 | C <sub>28</sub> H <sub>46</sub> O <sub>4</sub> | 0.0422  | 0.0249  | Didecyl phthalate                                        |

N.D. –Not detected



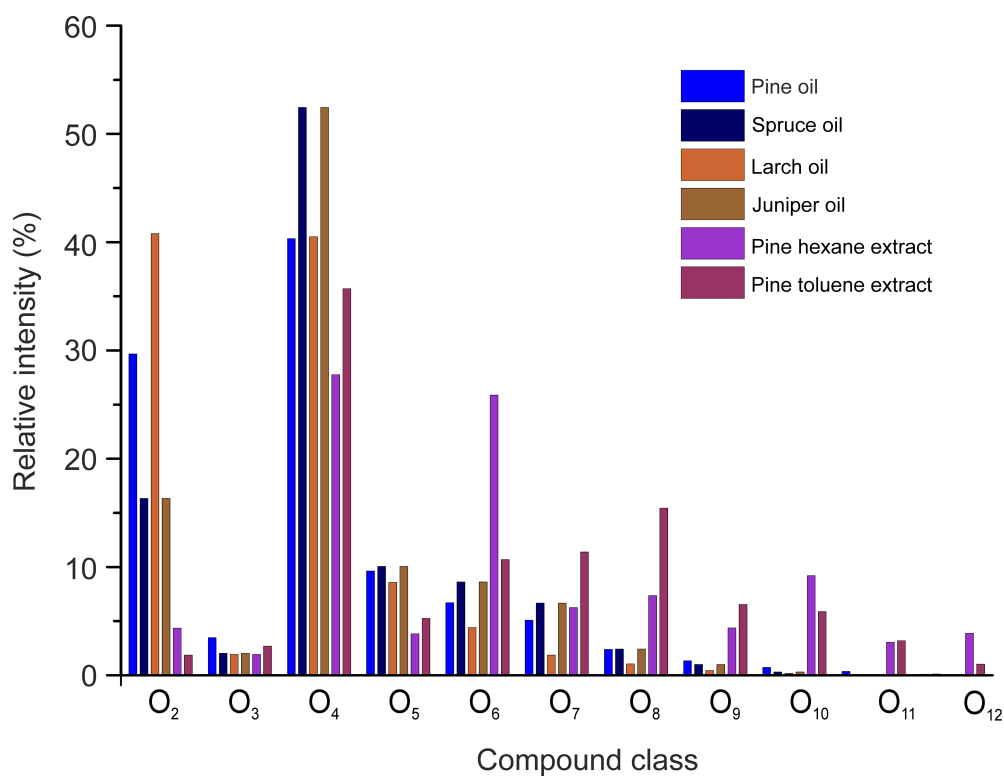

**Figure S1.** Negative-ion ESI compound class distributions of conifer needle essential oils and solvent extracts.

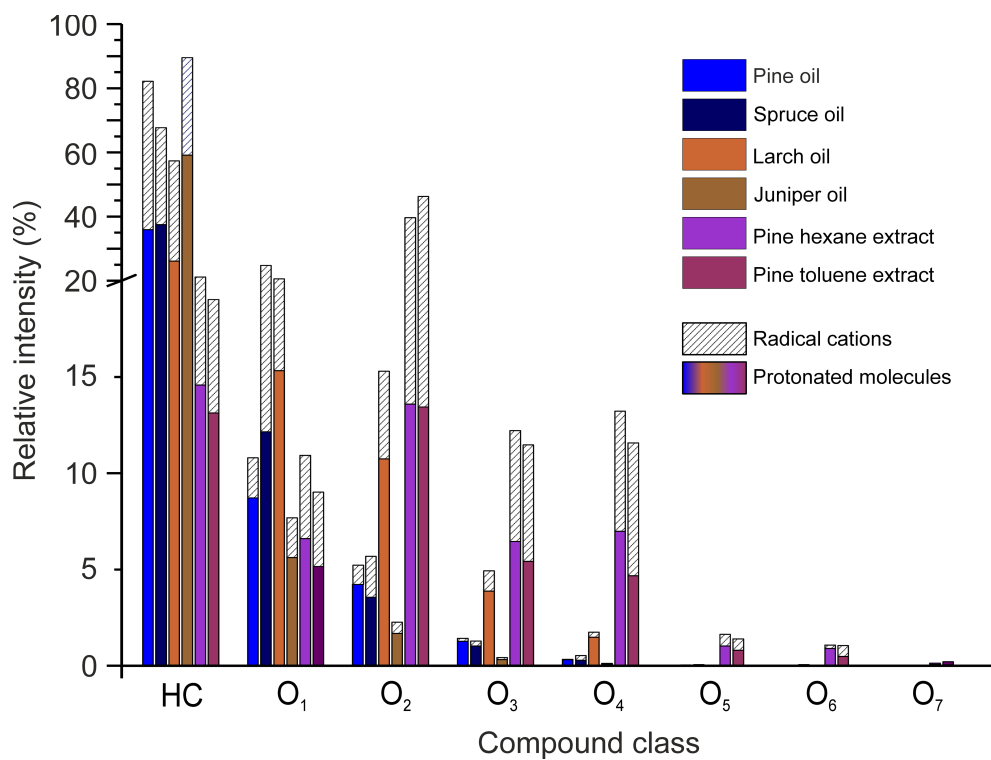

**Figure S2.** Positive-ion APPI compound class distributions of conifer needle essential oils and solvent extracts.
